# Supplementary material
Source: PubMed Central journal article supplement (PMC5470505)
Supplement: PEDS_20164023SupplementaryData.pdf [file PEDS_20164023SupplementaryData.pdf]

## Supplemental Information

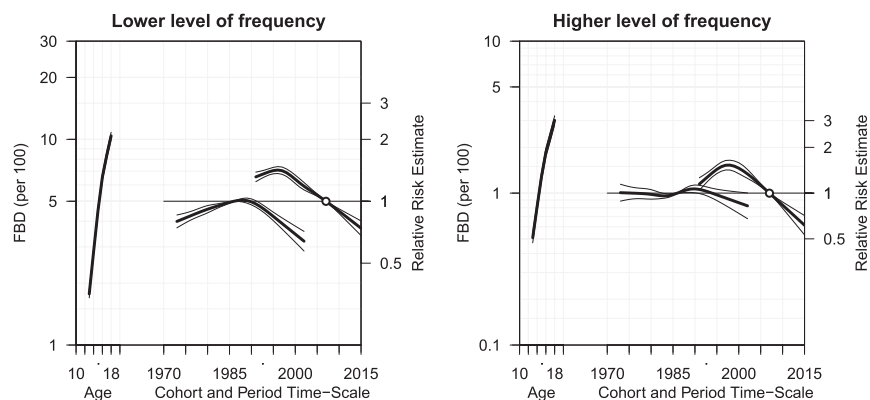

**SUPPLEMENTAL FIGURE 6**

APC sensitivity analyses on the probability of adolescents reporting FBD with alternative cut points: Lower level of frequency ( $\geq 1$  binge in the last 2 weeks) and Higher level of frequency ( $\geq 6$  binges in the last 2 weeks).

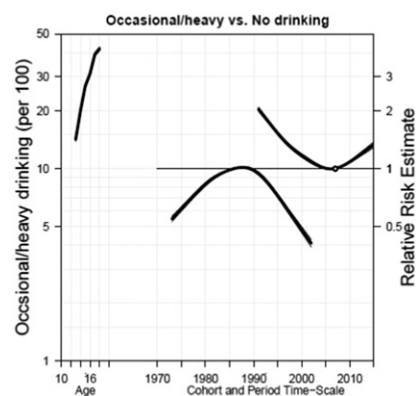

**SUPPLEMENTAL FIGURE 7**

APC sensitivity analysis on the probability of adolescents reporting occasional/heavy drinking (up to 1 binge in the last 2 weeks).

**SUPPLEMENTAL TABLE 2** Model Fit Statistics for APC Analysis of Adolescent FBD, by Sex

| Model Parameter   | Change in Deviance (Degrees of Freedom) |                |                |
|-------------------|-----------------------------------------|----------------|----------------|
|                   | All                                     | Boy            | Girl           |
| Age               | —                                       | —              | —              |
| Age-drift         | 3019.3 (1)***                           | 2451.8 (1)***  | 682.5 (1)***   |
| Age-cohort        | 1581.0 (3)***                           | 865.8 (3)***   | 794.6 (3)***   |
| Age-period-cohort | 56.9 (3)***                             | 50.1 (3)***    | 22.8 (3)***    |
| Age-period        | -223.6 (-3)***                          | -176.6 (-3)*** | -97.1 (-3)***  |
| Age-drift         | -1414.2.0 (-3)***                       | -739.2 (-3)*** | -720.4 (-3)*** |

Numbers in the table indicate the change in deviance which is based on an iterative model building strategy. The model begins with an age effect and tests whether the model fit is significantly improved if drift is added as a parameter. Then, cohort and period-cohort are added as a parameter. After the full age-period-cohort parameterization, parameters are removed to determine whether the model fit significantly decreases. Positive parameters indicate that the model has improved, and negative parameters indicate that the model has worsened.

\*\*\*  $P < .001$ .

**SUPPLEMENTAL TABLE 3** Model Fit Statistics for APC Analysis of Adolescent FBD, by Race/Ethnicity

| Model Parameter   | Change in Deviance (Degrees of Freedom) |                             |                            |                            |
|-------------------|-----------------------------------------|-----------------------------|----------------------------|----------------------------|
|                   | African American                        | White                       | Hispanic                   | Others                     |
| Age               | —                                       | —                           | —                          | —                          |
| Age-drift         | 41.9 (1) <sup>***</sup>                 | 2051.9 (1) <sup>***</sup>   | 505.9 (1) <sup>***</sup>   | 428.3 (1) <sup>***</sup>   |
| Age-cohort        | 57.0 (3) <sup>***</sup>                 | 1243.8 (3) <sup>***</sup>   | 225.6 (3) <sup>***</sup>   | 206.7 (3) <sup>***</sup>   |
| Age-period-cohort | 9.8 (3) <sup>*</sup>                    | 79.3 (3) <sup>***</sup>     | 2.0 (3)                    | 7.3 (3) <sup>†</sup>       |
| Age-period        | -32.3 (-3) <sup>***</sup>               | -198.5 (-3) <sup>***</sup>  | -65.6 (-3) <sup>***</sup>  | -80.5 (-3) <sup>***</sup>  |
| Age-drift         | -34.5 (-3) <sup>***</sup>               | -1124.6 (-3) <sup>***</sup> | -162.0 (-3) <sup>***</sup> | -133.6 (-3) <sup>***</sup> |

†  $P < .10$ .\*  $P < .05$ .\*\*\*  $P < .001$ .**SUPPLEMENTAL TABLE 4** Model Fit Statistics for APC Analysis of Adolescent FBD, by SES

| Model Parameter   | Change in Deviance (Degrees of Freedom)       |                                            |
|-------------------|-----------------------------------------------|--------------------------------------------|
|                   | Lower Parental Education: High School or Less | Higher Parental Education: College or More |
| Age               | —                                             | —                                          |
| Age-drift         | 988.5 (1) <sup>***</sup>                      | 1794.1 (1) <sup>***</sup>                  |
| Age-cohort        | 630.4 (3) <sup>***</sup>                      | 813.4 (3) <sup>***</sup>                   |
| Age-period-cohort | 38.0 (3) <sup>***</sup>                       | 34.9 (3) <sup>***</sup>                    |
| Age-period        | -56.7 (-3) <sup>***</sup>                     | -165.0 (-3) <sup>***</sup>                 |
| Age-drift         | -611.7 (-3) <sup>***</sup>                    | -683.3 (-3) <sup>***</sup>                 |

\*\*\*  $P < .001$ .**SUPPLEMENTAL TABLE 5** Model Fit Statistics for APC Analysis With Alternative Cut Points

| Model parameter   | Change in Deviance (Degrees of Freedom)                         |                                                                  |
|-------------------|-----------------------------------------------------------------|------------------------------------------------------------------|
|                   | Lower Level of Frequency ( $\geq 1$ Binges in the Last 2 Weeks) | Higher Level of Frequency ( $\geq 6$ Binges in the Last 2 Weeks) |
| Age               | —                                                               | —                                                                |
| Age-drift         | 2373.2 (1) <sup>***</sup>                                       | 894.6 (1) <sup>***</sup>                                         |
| Age-cohort        | 1075.4 (3) <sup>***</sup>                                       | 416.9 (3) <sup>***</sup>                                         |
| Age-period-cohort | 53.4 (3) <sup>***</sup>                                         | 78.0 (3) <sup>***</sup>                                          |
| Age-period        | -68.6 (-3) <sup>***</sup>                                       | -8.4 (-3) <sup>*</sup>                                           |
| Age-drift         | -1060.2 (-3) <sup>***</sup>                                     | -486.5 (-3) <sup>***</sup>                                       |

\*  $P < .05$ .\*\*\*  $P < .001$ .

**SUPPLEMENTAL TABLE 6** Sensitivity Analyses on the Association Between Demographic Variables and Probability of FBD With Alternative Cut Points: Lower Level of Frequency

|                     | Lower Level of Frequency ( $\geq 1$ Binges in the Last 2 Weeks) |                    |                    |                           |                           |                           |
|---------------------|-----------------------------------------------------------------|--------------------|--------------------|---------------------------|---------------------------|---------------------------|
|                     | 1991–1998                                                       | 1999–2006          | 2007–2015          | Interactions              |                           |                           |
|                     | <i>n</i> = 363 178                                              | <i>n</i> = 339 799 | <i>n</i> = 362 045 | 1991–1998 vs<br>1999–2006 | 1999–2006 vs<br>2007–2015 | 1991–1998 vs<br>2007–2015 |
| Sex                 |                                                                 |                    |                    |                           |                           |                           |
| Boy                 | 1                                                               | 1                  | 1                  |                           |                           |                           |
| Girl                | 0.50 (0.49–0.52)                                                | 0.57 (0.55–0.59)   | 0.65 (0.62–0.67)   | ***                       | ***                       | ***                       |
| Race                |                                                                 |                    |                    |                           |                           |                           |
| White               | 1                                                               | 1                  | 1                  |                           |                           |                           |
| African American    | 0.42 (0.40–0.44)                                                | 0.41 (0.39–0.44)   | 0.56 (0.52–0.60)   | N/S                       | ***                       | ***                       |
| Hispanic            | 1.02 (0.97–1.07)                                                | 0.96 (0.92–1.01)   | 0.96 (0.91–1.01)   | N/S                       | N/S                       | N/S                       |
| Other               | 0.79 (0.76–0.83)                                                | 0.78 (0.75–0.82)   | 0.82 (0.78–0.86)   | N/S                       | N/S                       | N/S                       |
| Parent education    |                                                                 |                    |                    |                           |                           |                           |
| High school or less | 1                                                               | 1                  | 1                  |                           |                           |                           |
| College more        | 0.82 (0.79–0.84)                                                | 0.80 (0.77–0.82)   | 0.77 (0.75–0.80)   | N/S                       | N/S                       | *                         |
| Age, y              |                                                                 |                    |                    |                           |                           |                           |
| 13–14               | 1                                                               | 1                  | 1                  |                           |                           |                           |
| 14–15               | 1.47 (1.37–1.58)                                                | 1.43 (1.32–1.55)   | 1.52 (1.36–1.69)   | N/S                       | N/S                       | N/S                       |
| 15–16               | 2.59 (2.42–2.77)                                                | 3.03 (2.81–3.26)   | 3.52 (3.18–3.89)   | **                        | *                         | ***                       |
| 16–17               | 3.07 (2.87–3.28)                                                | 3.56 (3.31–3.83)   | 4.00 (3.62–4.41)   | **                        | N/S                       | ***                       |
| 17–18               | 4.91 (4.61–5.23)                                                | 5.18 (4.82–5.56)   | 6.45 (5.85–7.11)   | N/S                       | ***                       | ***                       |
| 18–19               | 5.59 (5.24–5.96)                                                | 6.32 (5.88–6.78)   | 7.45 (6.77–8.20)   | *                         | **                        | ***                       |

95% confidence intervals are in parentheses. N/S, not significant.

\*  $P < .05$ .\*\*  $P < .01$ .\*\*\*  $P < .001$ .**SUPPLEMENTAL TABLE 7** Sensitivity Analyses on the Association Between Demographic Variables and Probability of FBD With Alternative Cut Points: Higher Level of Frequency

|                     | Higher Level of Frequency ( $\geq 6$ Binges in the Last 2 Weeks) |                    |                    |                           |                           |                           |
|---------------------|------------------------------------------------------------------|--------------------|--------------------|---------------------------|---------------------------|---------------------------|
|                     | 1991–1998                                                        | 1999–2006          | 2007–2015          | Interactions              |                           |                           |
|                     | <i>n</i> = 363 178                                               | <i>n</i> = 339 799 | <i>n</i> = 362 045 | 1991–1998 vs<br>1999–2006 | 1999–2006 vs<br>2007–2015 | 1991–1998 vs<br>2007–2015 |
| Sex                 |                                                                  |                    |                    |                           |                           |                           |
| Boy                 | 1                                                                | 1                  | 1                  |                           |                           |                           |
| Girl                | 0.39 (0.38–0.41)                                                 | 0.45 (0.42–0.47)   | 0.54 (0.51–0.58)   | ***                       | ***                       | ***                       |
| Race                |                                                                  |                    |                    |                           |                           |                           |
| White               | 1                                                                | 1                  | 1                  |                           |                           |                           |
| African American    | 0.53 (0.48–0.59)                                                 | 0.49 (0.44–0.55)   | 0.69 (0.61–0.77)   | N/S                       | ***                       | **                        |
| Hispanic            | 1.23 (1.14–1.32)                                                 | 1.12 (1.04–1.21)   | 1.01 (0.92–1.10)   | N/S                       | N/S                       | ***                       |
| Other               | 0.98 (0.91–1.06)                                                 | 0.98 (0.91–1.06)   | 0.99 (0.90–1.08)   | N/S                       | N/S                       | N/S                       |
| Parent education    |                                                                  |                    |                    |                           |                           |                           |
| High school or less | 1                                                                | 1                  | 1                  | —                         | —                         | —                         |
| College or more     | 0.77 (0.73–0.80)                                                 | 0.70 (0.66–0.73)   | 0.68 (0.64–0.72)   | **                        | N/S                       | **                        |
| Age, y              |                                                                  |                    |                    |                           |                           |                           |
| 13–14               | 1                                                                | 1                  | 1                  | —                         | —                         | —                         |
| 14–15               | 1.63 (1.43–1.86)                                                 | 1.42 (1.24–1.64)   | 1.71 (1.40–2.08)   | N/S                       | N/S                       | N/S                       |
| 15–16               | 2.58 (2.28–2.93)                                                 | 2.76 (2.42–3.15)   | 3.27 (2.72–3.93)   | N/S                       | N/S                       | *                         |
| 16–17               | 3.22 (2.85–3.64)                                                 | 3.34 (2.94–3.79)   | 3.79 (3.16–4.53)   | N/S                       | N/S                       | N/S                       |
| 17–18               | 5.19 (4.62–5.84)                                                 | 4.63 (4.08–5.24)   | 5.71 (4.78–6.82)   | N/S                       | N/S                       | N/S                       |
| 18–19               | 6.19 (5.51–6.95)                                                 | 5.54 (4.90–6.27)   | 6.85 (5.75–8.16)   | N/S                       | N/S                       | N/S                       |

95% confidence intervals are in parentheses. N/S, not significant.

\*  $P < .05$ .\*\*  $P < .01$ .\*\*\*  $P < .001$ .

**SUPPLEMENTAL TABLE 8** Model Fit Statistics for APC Analysis on Adolescent Occasional/Heavy Drinking

| Model Parameter   | Change in Deviance (Degrees of Freedom) |
|-------------------|-----------------------------------------|
| Age               | —                                       |
| Age-drift         | 8086.0 (1)***                           |
| Age-cohort        | 1209.0 (3)***                           |
| Age-period-cohort | 1051.0 (3)***                           |
| Age-period        | -1941.0 (-3)***                         |
| Age-drift         | -320.0 (-3)***                          |

\*\*\*  $P < .001$ .

**SUPPLEMENTAL TABLE 9** ORs for Association Between Demographic Variables and Probability of Occasional/Heavy Drinking, by Time Periods

|                     | 1991–1998        | 1999–2006        | 2007–2015        | Interactions              |                           |                           |
|---------------------|------------------|------------------|------------------|---------------------------|---------------------------|---------------------------|
|                     | $n = 363\,178$   | $n = 339\,799$   | $n = 362\,045$   | 1991–1998 vs<br>1999–2006 | 1999–2006 vs<br>2007–2015 | 1991–1998 vs<br>2007–2015 |
| Sex                 |                  |                  |                  |                           |                           |                           |
| Boy                 | 1                | 1                | 1                |                           |                           |                           |
| Girl                | 1.00 (0.99–1.02) | 1.07 (1.05–1.09) | 1.07 (1.05–1.09) | ***                       | N/S                       | ***                       |
| Race                |                  |                  |                  |                           |                           |                           |
| White               | 1                | 1                | 1                |                           |                           |                           |
| African American    | 0.60 (0.58–0.62) | 0.60 (0.58–0.62) | 0.70 (0.68–0.72) | N/S                       | ***                       | ***                       |
| Hispanic            | 0.96 (0.93–0.99) | 0.99 (0.97–1.02) | 0.96 (0.93–0.99) | N/S                       | N/S                       | N/S                       |
| Other               | 0.74 (0.72–0.76) | 0.76 (0.74–0.78) | 0.81 (0.78–0.83) | N/S                       | **                        | ***                       |
| Parent education    |                  |                  |                  |                           |                           |                           |
| High school or less | 1                | 1                | 1                |                           |                           |                           |
| College or more     | 0.97 (0.95–0.99) | 0.91 (0.89–0.93) | 0.90 (0.88–0.91) | ***                       | N/S                       | N/S                       |
| Age, y              |                  |                  |                  |                           |                           |                           |
| 13–14               | 1                | 1                | 1                |                           |                           |                           |
| 14–15               | 1.19 (1.15–1.22) | 1.25 (1.20–1.29) | 1.25 (1.20–1.31) | *                         | N/S                       | *                         |
| 15–16               | 1.85 (1.80–1.90) | 2.28 (2.21–2.36) | 2.63 (2.52–2.74) | ***                       | ***                       | ***                       |
| 16–17               | 1.95 (1.89–2.00) | 2.48 (2.39–2.56) | 2.91 (2.80–3.03) | ***                       | ***                       | ***                       |
| 17–18               | 2.72 (2.64–2.80) | 3.66 (3.54–3.79) | 4.86 (4.66–5.06) | ***                       | ***                       | ***                       |
| 18–19               | 2.89 (2.81–2.98) | 3.91 (3.78–4.04) | 5.38 (5.17–5.60) | ***                       | ***                       | ***                       |

95% confidence intervals are in parentheses. N/S, not significant.

\*  $P < .05$ .

\*\*  $P < .01$ .

\*\*\*  $P < .001$ .
